1 **Title: Uncovering a role for the dorsal hippocampal commissure in episodic memory**

2 **Running Title: The dorsal hippocampal commissure and episodic memory**

3 Authors: Postans M<sup>\*a,b</sup>, Parker GD<sup>a,c</sup>, Lundell H<sup>d</sup>, Ptito M<sup>e</sup>, Hamandi K<sup>a,f,g,i</sup>, Gray WP<sup>a,f,g,i</sup>, Aggleton JP<sup>a,b</sup>,

4 Dyrby TB<sup>d,j</sup>, Jones DK<sup>a,b,i,k</sup>, Winter M<sup>a,b,i,l</sup>

5 a. Cardiff University Brain Research Imaging Centre (CUBRIC), School of Psychology, Cardiff  
6 University, Cardiff, UK

7 b. School of Psychology, Cardiff University, Cardiff UK

8 c. Experimental MRI Centre (EMRIC), School of Biosciences, Cardiff University, Cardiff, UK

9 d. Danish Research Centre for Magnetic Resonance, Centre for Functional and Diagnostic  
10 Imaging and Research, Copenhagen University Hospital Hvidovre, Hvidovre, Denmark

11 e. School of Optometry, University of Montreal, Montreal, Canada and Department of  
12 Neurology and Neurosurgery, Montreal Neurological Institute, Montreal, Canada

13 f. The Alan Richens Welsh Epilepsy Centre, Department of Neurology, University Hospital of  
14 Wales, Cardiff UK

15 g. Institute of Psychological Medicine and Clinical Neurosciences, School of Medicine, Cardiff  
16 University, Cardiff, UK

17 h. Dept of Neurosurgery, Neurosciences Division, University Hospital Wales, Cardiff, UK

18 i. Brain Repair And Intracranial Neurotherapeutics (BRAIN) Unit, School of Medicine, Cardiff  
19 University, Cardiff, UK

20 j. Department of Applied Mathematics and Computer Science, Technical University of Denmark,  
21 Kongens, Lyngby, Denmark

22 k. School of Psychology, Australian Catholic University, Melbourne, Australia

23 l. Department of Clinical Neuropsychology, University Hospital of Wales, Cardiff, UK

24

25 Keywords: hippocampal commissure, tractography, episodic memory, familiarity, recollection

26 \* **Corresponding Author:** Dr Mark Postans

27 **Address:** Cardiff University Brain Research Imaging Centre (CUBRIC), School of Psychology, Cardiff

28 University, Maindy Road, Cardiff, CF24 4HQ

29

30 **Email:** [postansm@cardiff.ac.uk](mailto:postansm@cardiff.ac.uk)

31

## 32 **Abstract**

33 The dorsal hippocampal commissure (DHC) is a white matter tract that provides inter-hemispheric  
34 connections between temporal lobe brain regions. Despite the importance of these regions for  
35 learning and memory, there is scant evidence of a role for the DHC in successful memory performance.

36 We used diffusion-weighted MRI (DW-MRI) and white matter tractography to reconstruct the DHC  
37 across both humans (in vivo) and nonhuman primates (ex vivo). Across species, our findings  
38 demonstrate close consistency between the known anatomy and tract reconstructions of the DHC.

39 Anterograde tract-tracer techniques also highlighted the parahippocampal origins of DHC fibers in  
40 nonhuman primates. Finally, we derived Diffusion Tensor MRI (DT-MRI) metrics from the DHC in a  
41 large sample of human subjects to investigate whether inter-individual variation in DHC

42 microstructure is predictive of memory performance. The mean diffusivity of the DHC was correlated  
43 with performance in a standardised episodic memory task; an effect that was not reproduced in a  
44 comparison commissure tract – the anterior commissure. These findings highlight a role for the DHC

45 in episodic memory, and our tract reconstruction approach has the potential to generate further novel  
46 insights into the role of this previously understudied white matter tract in both health and disease.

47

48

## 49 **Introduction**

50 The two hemispheres of the brain are connected by commissural fiber systems that include the corpus  
51 callosum, anterior commissure (AC), posterior commissure, ventral hippocampal commissure (VHC),  
52 and dorsal hippocampal commissure (DHC) (Demeter et al. 1985). The DHC (alternatively the ‘dorsal  
53 psaltarium’) provides inter-hemispheric connections between functionally-related structures in the  
54 medial temporal lobes (MTL), including the presubiculum, entorhinal and parahippocampal cortex  
55 (Demeter et al. 1985, 1990; Gloor et al. 1993). Given that these regions play a key role in successful  
56 learning and memory (Zola-Morgan et al. 1989; Squire and Zola-Morgan 1991; Aggleton and Brown  
57 1999; Aggleton 2012), their ability to communicate effectively with contralateral homologous regions  
58 via the DHC may also be important for performance in these cognitive domains.

59 There have, however, been few studies of the function of the DHC, potentially due to  
60 misunderstanding around the cross-species anatomy of the DHC, as distinct from other local fiber  
61 populations such as the VHC, fornix, and corpus callosum (Demeter et al. 1985; Raslau et al. 2015;  
62 Tubbs et al. 2015). In rodents, the VHC supports dense inter-hemispheric connections between the  
63 hippocampi, which originate throughout the long-axis of the hippocampus; in nonhuman primates,  
64 VHC connections are reduced so that only the uncus and genu subdivisions of the hippocampal  
65 formation are connected to those in the contralateral hemisphere (Demeter et al. 1985; Gloor et al.  
66 1993). By contrast, the DHC remains a substantial tract in nonhuman primates, but it carries  
67 commissural projections to and from the parahippocampal region rather than the hippocampus  
68 proper. From injection sites in the presubiculum, entorhinal and parahippocampal cortex, tract tracer  
69 studies in nonhuman primates have traced labelled DHC fibers into the alveus and fimbria and then  
70 the posterior columns of the fornix; these fibers arch dorso-anteriorly and then turn medially to cross  
71 the midline along the inferior aspect of the corpus callosum, before taking a mirror-image route back  
72 to the contralateral parahippocampal region (Demeter et al. 1985, 1990). Anatomical studies have  
73 found no convincing evidence of a VHC in humans but the location of the human DHC corresponds  
74 precisely to that reported for nonhuman primates (Gloor et al. 1993). Despite their distinct anatomy,  
75 the VHC and DHC are sometimes collectively termed ‘the hippocampal commissure’ (Demeter et al.

76 1985), and the DHC is sometimes described as part of the fornix (e.g., ‘fornix commissure’) (Mark et  
77 al. 1993). It is, however, difficult to infer the function of the DHC from potentially informative clinical  
78 case reports and animal studies if it is not appropriately differentiated from these other structures.

79 In one relevant study highlighting a potential role for the DHC in successful learning and memory,  
80 fornix transection did not impair the ability of monkeys to learn concurrent visual discriminations, but  
81 the fornix damage in one subject extended to the DHC, and that subject made significantly more errors  
82 and required more training sessions to learn the task compared to the slowest control (Moss et al.  
83 1981). This subject was also impaired in an object recognition task (Mahut et al. 1981). Similarly,  
84 clinical case reports describe individuals with anterograde amnesia following combined DHC and  
85 fornix damage (Heilman and Sybert 1977; D’Esposito et al. 1995), although it is difficult to evaluate  
86 the effect of DHC damage in these cases because fornix damage alone is sufficient to produce  
87 anterograde amnesia (Aggleton 2008). A deficit in both verbal and visual recall has also been reported  
88 in patients who underwent callosotomy surgery for intractable epilepsy but only when the section  
89 included the posterior corpus callosum (Clark and Geffen 1989; Phelps et al. 1991). This is pertinent  
90 because the rostral splenium and posterior DHC fibers are intermingled, so split brain surgery involving  
91 the posterior corpus callosum always involves DHC transection.

92 The inferences we can derive from these small, methodologically heterogenous studies are, however,  
93 limited. Patients with verifiable DHC damage are extremely rare, and there are no reported cases of  
94 DHC damage sparing other relevant structures. An alternative approach is to examine whether inter-  
95 individual variation in the microstructure of the DHC is related to differences in memory performance.  
96 Bégré et al., used diffusion tensor imaging (DTI) to search, voxel-wise, for a correlation between a  
97 measure of white matter microstructure (inter-voxel coherence) and performance in the Rey Visual  
98 Design Learning Test (Bégré et al. 2009). In their small sample (N=14), the authors reported that  
99 clusters of voxels demonstrating such a relationship overlapped with the DHC. The reported  
100 coordinates, however, correspond to the inferior-caudal surface of the splenium, whereas histological

101 studies localise the DHC ventral to the corpus callosum body with posterior DHC fibers becoming  
102 intermingled with those of the *rostral* splenium (Demeter et al. 1990). The clusters reported by Begré  
103 et al., may therefore lack specificity to the DHC. Wei et al., recently demonstrated that white matter  
104 tractography and DW-MRI, can be used to isolate and reconstruct the trajectory of the human DHC,  
105 *in vivo*, but no individual subject-level reconstructions were shown (a group-level reconstruction was  
106 provided) and the study did not investigate the relationship between DHC microstructure and  
107 cognitive performance (Wei et al. 2017). A study in a larger sample is therefore required to isolate the  
108 human DHC systematically and investigate the functional role of this tract in memory. Evidence that  
109 the DHC can be reconstructed accurately in nonhuman primates, where the tract morphology has  
110 been well characterised, would reinforce confidence in the accuracy of human DHC reconstructions.

111 In the present study, we report a semi-automated tractography approach that can be used to  
112 reconstruct the DHC across humans (*in vivo*) and nonhuman primates (*ex vivo*). We also present tract  
113 tracer findings highlighting that primate DHC fibers form a distinct tract and originate in the  
114 parahippocampal region rather than the hippocampal formation. Finally, we derived diffusion tensor  
115 imaging metrics from the DHC in a large sample of 100 human subjects, to investigate whether inter-  
116 individual variation in the microstructure of this tract correlates with memory performance. We also  
117 assessed whether the bilateral volumes of several relevant gray matter MTL regions relates to memory  
118 performance.

119

120

## 121 **Materials and Methods**

### 122 ***Data***

#### 123 *Ex vivo non-human primate MR data*

124 Diffusion- and T1-weighted MR data that were obtained previously from the perfusion-fixed brains of  
125 four healthy adult female vervet monkeys (*Chlorocebus sabeus*; specimens e3429, e3487, e3494, and  
126 e4271), were available for analysis (age range = 32-48 months; mean = 36.25, SD = 7.85). The animals  
127 were obtained from the Behavioral Science Foundation, St. Kitts and were socially housed in enriched  
128 environments. The experimental procedures were reviewed and approved by the Institutional Review  
129 Board of the Behavioral Science Foundation, acting under the auspices of the Canadian Council on  
130 Animal Care. The postmortem brains were prepared for data collection on a preclinical 4.7 T Agilent  
131 scanner system at the Danish Research Centre for Magnetic Resonance using an *ex vivo* imaging  
132 protocol reported previously (Dyrby et al. 2011, 2014). This included a DW-MRI pre-scan of at least 15  
133 hours duration to avoid introducing short-term instabilities into the final DW-MRI datasets (e.g., due  
134 to motion caused by physical handling of the tissue (Dyrby et al. 2011, 2013)). The brain specimens  
135 were also stabilized to room temperature prior to scanning, and a conditioned flow of air around the  
136 specimen was maintained throughout scanning to reduce temperature drifts of the diffusion signal  
137 (Dyrby et al. 2011, 2013).

138 Diffusion-weighted images were collected using a diffusion-weighted pulsed gradient spin echo  
139 sequence with single line readout. The scan parameters were as follows: repetition time, TR = 7200  
140 (but TR = 8400ms for subject e4271); echo time, TE = 35.9ms; gradient separation, DELTA = 17.0ms;  
141 gradient duration, delta = 10.5ms; gradient strength, g = 300 mT/m; number of repetitions, NEX = 2  
142 (averaged offline); matrix size = 128 x 256 with 100 axial slices offering whole brain coverage with  
143 isotropic 0.5mm voxels. Gradients were applied along 68 uniformly distributed directions with a b-  
144 value of 9686 s/mm<sup>2</sup> using scheme files available from the Camino tool kit(Cook et al. 2006). Thirteen  
145 non diffusion-weighted images with b = 0 s/mm<sup>2</sup> were also acquired. T1-weighted images were  
146 acquired using a 3D MPRAGE sequence with 0.27mm isotropic voxels and the following parameters:  
147 TR = 4ms; TE = 2ms; TI = 800ms; FA = 9°; matrix = 256 x 256 x 256, axial image plane.

148

149 *Ex vivo non-human primate anterograde tract tracer data*

150 To highlight the distinct origins of fibers comprising the DHC and the nearby fornix, we examined ex  
151 vivo brain specimens obtained from two male cynomolgus monkeys (*Macaca fascicularis* - ACy14 and  
152 ACyF23) aged 1-2 years, that had received anterograde tract tracer injections in different medial  
153 temporal lobe regions for a previous study of the origin and topography of the fibers comprising the  
154 fornix (Saunders and Aggleton 2007). Like the vervet monkeys used for our ex vivo tractography  
155 analyses, cynomolgus monkeys are members of the *Cercopithecinae* subfamily of Old World monkeys,  
156 and the anatomy of the brain is considered to be very similar across these species (Woods et al. 2011).  
157 The reader is referred to the original manuscript for a detailed description of the stereotactic surgery  
158 and subsequent brain extraction protocols (Saunders and Aggleton 2007), but briefly, a cocktail of  
159 tritiated amino acids was injected into distinct target regions within the medial temporal lobe across  
160 the two cases. This cocktail was composed of an equal-parts mixture of either tritiated proline and  
161 leucine (final concentration of 50  $\mu\text{Ci}/\mu\text{l}$ , New England Nuclear), or tritiated proline, leucine, lysine,  
162 and an amino acid mixture derived from algal protein hydrosylate (final concentration of 100  $\mu\text{Ci}/\mu\text{l}$ ,  
163 New England Nuclear), and was injected into the surgically exposed target region using a Hamilton  
164 syringe. Specimen ACy14 received an injection in the hippocampal formation, centred in the  
165 subiculum, whereas specimen ACyF23 received an injection that incorporated the caudal perirhinal  
166 cortex and the rostral parahippocampal cortex. Following a 5-10 day postoperative survival period,  
167 the two monkeys were deeply anesthetized and the brain was extracted and cryoprotected. The  
168 specimens were cut into 33 $\mu\text{m}$  coronal sections, coated with emulsion and subsequently exposed at  
169 4  $^{\circ}\text{C}$  for 6-30 weeks before being developed and counterstained for thionine. Specimen ACyF23 had  
170 undergone a bilateral fornix transection procedure 2-12 months prior to the injection of the tritiated  
171 amino acids; the case is nevertheless informative because the subsequent amino acid injections  
172 resulted in labelling up to the point of the transection.

173

174 *In vivo human MR and cognitive data*

175 Cognitive, diffusion- and T1-weighted MR data were obtained for 100 subjects from the Q3 release of  
176 the Human Connectome Project (50 males, aged 22-35 years) (Glasser et al. 2013; Sotiropoulos et al.  
177 2013; Van Essen et al. 2013). The participants in that previous study were recruited from Washington  
178 University and the surrounding area and gave informed consent in line with policies approved by the  
179 Washington University Institutional Review Board. We co-opted these data for the present analyses to  
180 exploit the high-quality diffusion-weighted images that are acquired through the HCP owing to the  
181 superior gradient strengths afforded by their customized gradient set. This subsample of the available  
182 HCP data will henceforth be referred to as the 'HCP dataset'.

183 For each subject, whole-brain diffusion- and T1-weighted images had been acquired on a customized  
184 3T Connectom Skyra scanner (Siemens, Erlangen) with a 32-channel head coil and a customised SC72C  
185 gradient set. Each pre-processed dataset comprised 90 diffusion directions for each of three shells  
186 with  $b$ -values of 1000, 2000 and 3000  $s/mm^2$ ; these images were acquired with TR = 5500ms, TE =  
187 89ms and 1.25mm<sup>3</sup> isotropic voxels. 18 images with  $b = 0 s/mm^2$  were also acquired. Corresponding  
188 T1-weighted images were acquired by taking two averages using the 3D MPRAGE sequence (Mugler  
189 and Brookeman 1990), with 0.7mm<sup>3</sup> isotropic voxels and the following parameters: TR = 2400ms, TE  
190 = 2.14ms, TI = 1000ms, FA = 8°, FOV = 224mm, matrix = 320 x 320 x 256 sagittal slices in a single slab.  
191 Note that the pre-processed HCP diffusion datasets are aligned to the T1 images using FLIRT (Jenkinson  
192 and Smith 2001; Jenkinson et al. 2002) as standard so that both the diffusion and T1 data that were  
193 available to us were pre-aligned in 1.25mm native structural space. Further acquisition parameters  
194 and details of the minimal MR pre-processing pipeline have been reported previously (Glasser et al.  
195 2013; Sotiropoulos et al. 2013).

196 Available cognitive data for the HCP subjects included performance in the Computerized Penn Word  
197 Memory task (CPWM)(Moore et al. 2015), the Picture Sequence Memory Test (PSMT) (Dikmen et al.  
198 2014) and the List Sorting Working Memory Test (LSWMT) (Tulsky et al. 2014). The CPWM is a verbal



199 episodic memory task in which a participant is required to discriminate 20 pre-exposed target word  
200 stimuli from 20 inter-mixed novel distractor stimuli; performance is quantified here as subjects' total  
201 number of correct responses. In the PSMT, another episodic memory task, subjects are required to  
202 learn and recall a sequence of picture stimuli over a number of trials and performance is scored as the  
203 cumulative number of adjacent pairs of pictures that are correctly recalled over 3 learning trials. In  
204 the LSWMT, subjects are presented with a series of picture stimuli on a computer screen (e.g., an  
205 elephant and a mouse) and are required to remember the stimuli comprising the sequence, mentally  
206 reorder them from smallest to largest, and finally recite the revised sequence of stimuli; performance  
207 is scored as the number of correct responses across the stimulus lists that comprise this working  
208 memory task. For both the PSMT and LSWMT, HCP subjects' raw scores have been standardised  
209 against the NIH Toolbox normative sample (Weintraub et al. 2013). These standardised scores can also  
210 be age-adjusted, but given that we had non age-adjusted raw scores for the CPWM, we used subjects'  
211 unadjusted PSMT and LSWMT scores for subsequent analyses.

212 Finally, pre-existing regional volume measures were available for a number of relevant cortical and  
213 subcortical regions in the HCP dataset, because the T1- and T2- weighted images that are acquired for  
214 the HCP are segmented using Freesurfer software as part of the standard pre-processing pipeline  
215 (Glasser et al. 2013). We used these data to investigate whether differences in CPWM, PSMT and/or  
216 LSWMT performance, are also related to the volume of several key gray matter regions within the  
217 MTL. Our specific regions-of-interest (ROIs) were the hippocampi, amygdalae, entorhinal cortex,  
218 parahippocampal cortex (areas TH and TF), as well as the temporal pole, and estimates of total  
219 Intracranial Volume (ICV). The hippocampus was of interest because the DHC is sometimes assumed  
220 to support dense inter-hippocampal connections, despite an absence of confirmatory evidence  
221 (Demeter et al. 1990). By contrast, the entorhinal and parahippocampal cortices are known to project  
222 to contralateral structures via the DHC (Demeter et al. 1985, 1990), and they also provide a  
223 functionally important input/output pathway for the hippocampus itself (Aggleton 2012). The  
224 temporal pole and amygdala were ROIs that are known to project to or receive from contralateral

225 structures via the anterior commissure (AC), which was used as a comparison tract for our  
226 tractography analyses, as described below (Klingler and Gloor 1960; Turner et al. 1979; Demeter et al.  
227 1985).

228

229

## 230 **Data Processing**

### 231 *Ex vivo non-human primate MR data*

232 The T1-weighted images for each nonhuman primate specimen were masked to contain only brain  
233 tissue using FSL utilities (Smith et al. 2004). Gray/white matter contrast is reversed in our T1 images  
234 of *ex vivo* tissue (Dyrby et al. 2018); we therefore inverted the T1-weighted images for subsequent  
235 processing and display purposes. The T1-weighted brain images were then submitted to the standard  
236 Nonhuman Primate EMSegmenter pipeline in 3DSlicer version 4.9.0. The pipeline registers the T1-  
237 weighted image to a probabilistic vervet monkey MRI atlas using BRAINSFit (Johnson et al. 2007;  
238 Fedorov, A., Li, X., Pohl, K.M., Bouix, S., Styner, M., Addicott, M., Wyatt, C., Daunais, J.B., Wells, W.M.,  
239 & Kikinis 2011), and segments the image into unilateral ROIs, including the hippocampus, using the  
240 EM segmenter algorithm (Pohl et al. 2007). The subject-specific aligned and unbiased hippocampus  
241 segmentations were thresholded at 40%, binarised, and brought into native diffusion space using  
242 FLIRT, ready for use as ROIs for tractography.

243 Visual inspection of the DW-MRI datasets revealed that no additional pre-processing was required to  
244 adjust for motion or eddy currents prior to streamline reconstruction (Dyrby et al. 2014). A multiple-  
245 ROI tractography approach (see Fig 1A) was used to reconstruct the DHC. Tractography was performed  
246 from all voxels in the left hippocampus ROI in subjects' native diffusion-space in ExploreDTI v4.8.3  
247 (Leemans et al. 2009) using a deterministic tractography algorithm based on constrained spherical  
248 deconvolution (Tournier et al. 2008; Jeurissen et al. 2011). The contralateral hippocampal ROI was

249 used as an 'AND' gate to capture any propagated streamlines that terminated in the contralateral  
250 hippocampal/parahippocampal region. Three additional 'NOT' ROIs were manually drawn to exclude  
251 streamlines corresponding to other pathways. These included: 1) An ROI covering the entire section,  
252 drawn on the most inferior axial slice where the body of the corpus callosum was visible, 2) A coronal  
253 ROI covering the entire section placed at a slice where the parahippocampal cingulum begins to  
254 descend behind the splenium, and 3) A coronal ROI covering the entire section except the temporal  
255 lobes, placed at the slice where the anterior fornix columns descend towards the mammillary bodies.  
256 Additional exclusionary ROIs were used to remove extant spurious streamlines as required. A step size  
257 of 0.1mm and an angle threshold of 60 degrees was applied to prevent the reconstruction of  
258 anatomically implausible streamlines. Tracking was performed with a supersampling factor of 4 x 4 x  
259 4, so that streamlines were initiated from 64 grid points, uniformly distributed within each voxel.

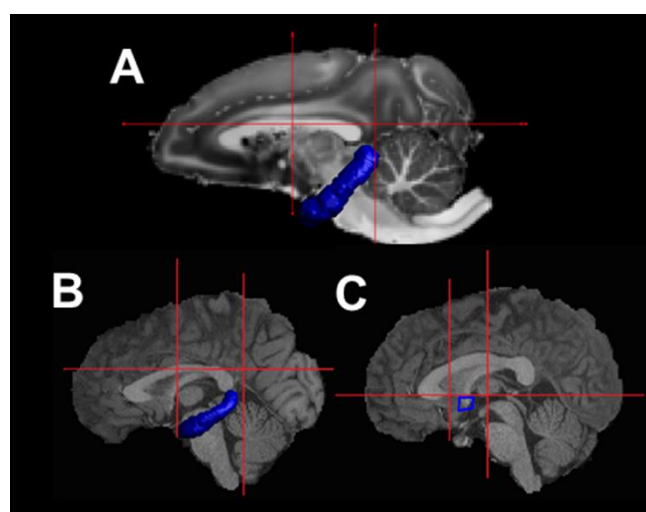

260

261 **Figure 1.** Regions of interest (ROIs) used for dorsal hippocampal commissure (DHC) and anterior commissure  
262 (AC) tractography. The hippocampal (blue) and manually drawn (red lines) ROIs used for DHC tractography  
263 shown on a mid-sagittal section of a T1-weighted image for a representative ex vivo nonhuman primate  
264 specimen in 0.5mm<sup>3</sup> native diffusion space (A) and a Human Connectome Project (HCP) subject in 1.25mm<sup>3</sup>  
265 native diffusion space (B). Also shown are the manually-drawn ROIs used for AC tractography (red and yellow  
266 lines) in a representative HCP subject (C).

267

268

269 *Ex vivo non-human primate anterograde tract tracer data*

270 A Leica DM500B microscope with a Leica DFC310FX digital camera and Leica Application Suite v4.7  
271 image acquisition software were used to obtain both bright- and dark-field images from our ex vivo  
272 cynomolgus monkey specimens.

273

274 *In vivo human MR and cognitive data*

275 Whole brain voxel-wise maps of two DTI measures of white matter microstructure – Fractional  
276 Anisotropy and Mean Diffusivity (FA and MD, respectively) (Basser and Pierpaoli 2011) - were derived  
277 from the  $b = 1000$  s/mm<sup>2</sup> images. Unilateral hippocampal ROIs were segmented from subjects' T1-  
278 weighted images using FIRST (Patenaude et al. 2011). Streamlines were then seeded from the left  
279 hippocampus using the same combination of ROIs described above (Fig 1B), and a multi-shell multi-  
280 tissue constrained spherical deconvolution algorithm (MSMT-CSD) was applied to the subjects'  
281 complete diffusion dataset (Jeurissen et al. 2014). This process was then repeated with tractography  
282 seeded from the right hippocampus. Tracking parameters were the same as above except a step size  
283 of 0.5 mm was applied. Two additional ROIs were then drawn around the DHC reconstructions on  
284 sagittal sections located 5 slices from the midline of the brain to extract a transverse segment of the  
285 DHC, where the streamlines are well differentiated from those of other local white matter pathways.  
286 This was done separately for the reconstructions obtained by seeding tractography from the left and  
287 right hemispheres. The transverse DHC segments were intersected with the whole brain voxel-wise  
288 FA and MD maps. For both FA and MD, the mean measures obtained from the two segments were  
289 then combined into a vertex-weighted mean measure as follows:

290

291 Vertex-Weighted Mean FA = 
$$\frac{(N_{L \rightarrow R} \times \overline{FA_{L \rightarrow R}}) + (N_{R \rightarrow L} \times \overline{FA_{R \rightarrow L}})}{N_{L \rightarrow R} + N_{R \rightarrow L}}$$

292 
$$(N_{L \rightarrow R} + N_{R \rightarrow L})$$

293

294 Vertex-Weighted Mean MD = 
$$\frac{(N_{L \rightarrow R} \times \overline{MD_{L \rightarrow R}}) + (N_{R \rightarrow L} \times \overline{MD_{R \rightarrow L}})}{(N_{L \rightarrow R} + N_{R \rightarrow L})}$$

295

296

297

298 where  $N_{L \rightarrow R}$  and  $N_{R \rightarrow L}$  refer to the number of vertices comprising the tract segment obtained by  
299 seeding tractography from the left and right hemisphere, respectively.  $\overline{FA_{L \rightarrow R}}$  and  $\overline{FA_{R \rightarrow L}}$  refer to the  
300 mean FA measure obtained from the left- and right-seeded segment; likewise,  $\overline{MD_{L \rightarrow R}}$  and  $\overline{MD_{R \rightarrow L}}$   
301 refer to the mean MD measure obtained from the left- and right-seeded segment. These vertex-  
302 weighted measures of mean FA and MD take into account any potential differences in the number of  
303 streamlines that comprise the left versus right-seeded segments, and were later correlated with  
304 memory measures. For the sake of brevity, in the remainder of the text we refer simply to mean FA  
305 and MD measures without reference to the vertex-weighting that was applied.

306 For comparison, these measures were also obtained from a transverse segment of the anterior  
307 commissure (AC). The AC is a commissural fiber pathway – the function of which is not well understood  
308 – that provides interhemispheric connections between the temporal pole, the amygdala, the superior  
309 and inferior temporal gyri, and the parahippocampal gyrus (Demeter et al. 1990). Given that both the  
310 DHC and AC contain fibers that originate and cross in the parahippocampal gyrus, we restricted our  
311 AC analyses to those relatively ‘anterior projections’ of this fiber bundle, which involve the temporal  
312 pole and amygdala. This was achieved by seeding tractography from an ROI manually drawn around  
313 the AC on a sagittal section 5 slices from the midline, where the AC is visible at the point it bifurcates  
314 the descending fornix columns (see Fig 1C). This ‘SEED’ ROI was initially drawn in the left hemisphere,  
315 and a corresponding ‘AND’ ROI was placed at the same point in the right hemisphere. An exclusionary

316 'NOT' ROI with whole-brain coverage was then drawn on an axial slice immediately above the AC.  
317 Another, covering the whole brain except the temporal lobes, was drawn on a coronal section  
318 immediately posterior to the rostrum of the corpus callosum. A final 'NOT' ROI was drawn around the  
319 whole brain on a coronal section located just anterior to the pons. This procedure was repeated with  
320 the seed and the AND ROIs placed in the opposite hemispheres. The initial seed and 'AND' ROIs were  
321 then used to extract a transverse segment of the AC from both reconstructions. Mean FA and MD  
322 metrics were extracted and combined using the above formula.

323

### 324 *Statistical Analysis*

325 Two-tailed Pearson correlation statistics were used to investigate the relationship between DT-MRI  
326 measures of DHC and AC microstructure (FA and MD), and performance in three standardised memory  
327 tasks (CPWM, PSMT and LSWMT). Correlation statistics were computed with 1000 bootstrapped  
328 samples to derive 95% confidence intervals, and a Bonferonni-Holm step-down procedure was used  
329 to adjust derived  $p$ -values for six structure-cognition correlations, separately for each tract (the DHC  
330 and AC). Subjects in whom both the DHC and AC were successfully reconstructed were included in  
331 these analyses to enable fair comparisons between dependent correlations across these tracts. To test  
332 for differences between correlations across the DHC and AC, any significant structure-cognition  
333 associations identified in one tract, were compared with the corresponding correlation in the other  
334 tract using one-tailed Steiger Z tests, which are reported alongside Cohen's  $q$  effect size measures  
335 (Cohen 1988). A significance threshold of  $p = 0.05$  was used for all comparisons.

336 The same correlational approach was used to investigate the relationship between memory  
337 performance (in the CPWM, PSMT and LSWMT) and the volume of individual temporal lobe regions  
338 including the amygdala, hippocampus, temporal pole, entorhinal and parahippocampal cortices.  
339 Bilateral volume measurements were used to maximise statistical power, and  $p$ -values were  
340 Bonferonni-Holm adjusted for fifteen volume-cognition correlations. Regional gray matter volume

341 measures are often confounded by inter-individual differences in total intracranial volume (ICV); we  
342 therefore used the following formula to adjust volume measurements for differences in ICV prior to  
343 any correlational analyses:

344

$$345 \text{ Measure}_{\text{adjusted}} = \text{Measure}_{\text{raw}} - \beta (\text{ICV}_{\text{raw}} - \text{ICV}_{\text{mean}})$$

346

347 where  $\text{ICV}_{\text{raw}}$  refers to a subject's ICV estimate,  $\text{ICV}_{\text{mean}}$  refers to the mean ICV in the HCP dataset, and  
348  $\beta$  refers to the slope of the regression line between ICV and the measure of interest (Voevodskaya et  
349 al. 2014).

350

351

## 352 **Results**

### 353 **Ex vivo non-human primate MR data**

354 To demonstrate the feasibility of a white matter tractography approach for investigating the role of  
355 the DHC in human episodic memory, we first applied a multiple region-of-interest (ROI) deterministic  
356 tractography protocol to diffusion- and T1-weighted images obtained from four ex vivo nonhuman  
357 primate brain specimens (see Methods, Fig 1 and Fig 2A). In all four specimens, this revealed a large  
358 number of streamlines (mean: 2367.75, SD: 1383.791) that were broadly consistent with the known  
359 anatomy of the non-human primate DHC (see Fig 2B-E). At the midline of the brain, the transverse  
360 portion of the DHC streamlines was situated along the anterior and inferior aspect of the rostral  
361 splenium of the corpus callosum. More laterally, these streamlines arched inferiorly towards the  
362 hippocampus and parahippocampal region. Whilst a number of these streamlines progressed  
363 inferiorly towards regions along the parahippocampal gyrus (see Fig 2A, right), consistent with the

364 known anatomy, a number terminated in or around the hippocampus after having intersected our  
365 hippocampal ROIs. This finding highlights limitations in resolving crossing fiber populations with  
366 existing tractography techniques, and the fact that near the tail of the hippocampus, DHC fibers are  
367 known to merge with those of the fornix-fimbria and the alveus, which then cover the hippocampus  
368 (Gloor et al. 1993). Indeed, Fig 3A-C shows the DHC reconstruction for a representative specimen  
369 alongside streamlines corresponding to the fornix, which were reconstructed for illustrative purposes  
370 using a multiple-ROI approach reported previously (Metzler-Baddeley et al. 2011); whilst the  
371 transverse portion of the DHC is readily differentiated, more laterally, many of the DHC streamlines  
372 become intermingled with those of the fornix as the latter covers the hippocampus. Nevertheless,  
373 these ex vivo DHC reconstructions suggest that white matter tractography can be used to detect and  
374 reconstruct inter-hemispheric DHC connections, and that the transverse portion of these fiber  
375 pathway reconstructions in particular, is well characterised and differentiated from the fornix. The  
376 reconstructions were similar in humans (Fig 3D), so our subsequent quantitative analyses in human  
377 subjects were based on mean microstructure measures that were extracted from this transverse  
378 portion of the DHC (see Methods).

379

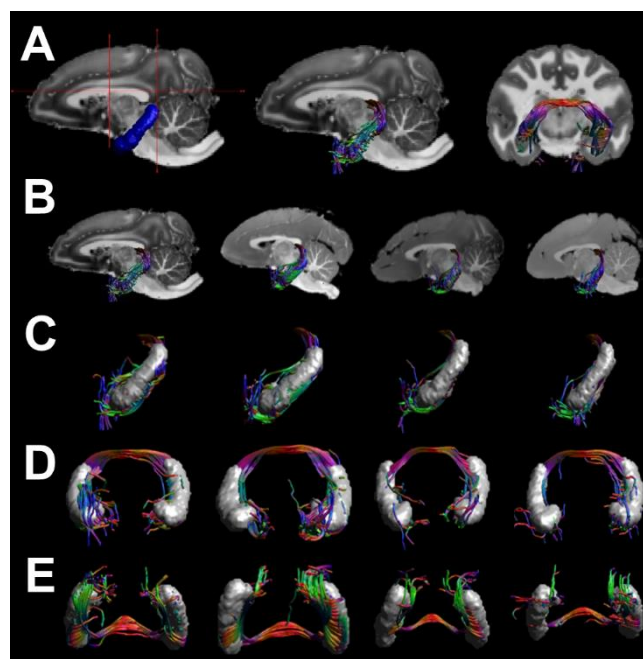

380



381 **Figure 2.** Regions-of-interest (ROIs) used to extract the dorsal hippocampal commissure (DHC) and the  
382 subsequent tract reconstructions. The hippocampal (blue) and manually-drawn (red lines) ROIs used to extract  
383 the DHC in one representative specimen, and the subsequent reconstructions shown over a mid-sagittal and  
384 coronal section from the corresponding T1-weighted image in 0.5mm<sup>3</sup> native diffusion space (A); The  
385 reconstructions in all four specimens (B); The DHC reconstructions illustrated from a left-lateral, anterior-  
386 posterior, and inferior-superior perspective, alongside the anatomical hippocampal ROIs for spatial context (C,  
387 D and E, respectively). Note that for computational purposes, these renderings contain a 1/8<sup>th</sup> subsample of all  
388 reconstructed streamlines.

389

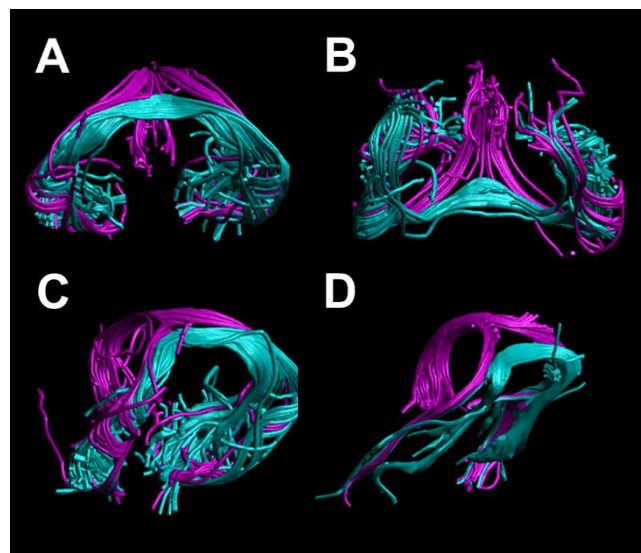

390

391 **Figure 3.** Dorsal hippocampal commissure (teal) and fornix (purple) streamlines reconstructed in representative  
392 cases. Streamlines corresponding to these tracts are shown for a representative ex vivo nonhuman primate  
393 specimen, shown from a rear coronal-oblique (A), ventral (B) and left-lateral oblique (C) perspective. For  
394 comparison, streamlines corresponding to these two tracts are also shown for a representative Human  
395 Connectome Project (HCP) subject, from a left-lateral oblique perspective (D).

396

397

398 **Ex vivo non-human primate tract tracer data**

399 To highlight the veridical cortical origins of the inter-hemispheric DHC streamlines that were  
400 reconstructed in the previous analysis, we next examined bright- and dark-field photomicrographs  
401 taken from two ex vivo nonhuman primate specimens that had previously received anterograde tract  
402 tracer injections of radioactive amino acids in different locations within the medial temporal lobe. In  
403 a specimen that received an injection in the hippocampal formation itself, centred on the subiculum,  
404 strong labelling was present in the ipsilateral but not the contralateral fornix or the DHC (Figs 4A-C).  
405 This is consistent with previous research showing that the majority of fibers comprising the fornix  
406 originate in the subicular cortices and CA subregions of the hippocampal formation, and that neither  
407 the fornix or DHC supports inter-hemispheric connections between these regions (Saunders and  
408 Aggleton 2007). By contrast, dark field photomicrographs from a specimen that received an injection  
409 of tracer into caudal perirhinal and rostral parahippocampal cortex, revealed labelling in both the left  
410 and right DHC but almost no label in either the ipsilateral or contralateral fornix (Fig 4D-E). This  
411 distribution is consistent with DHC fibers originating in regions within the parahippocampal gyrus  
412 rather than the hippocampus proper. These findings highlight the distinct cortical origins of the  
413 nonhuman primate fornix and DHC.

414

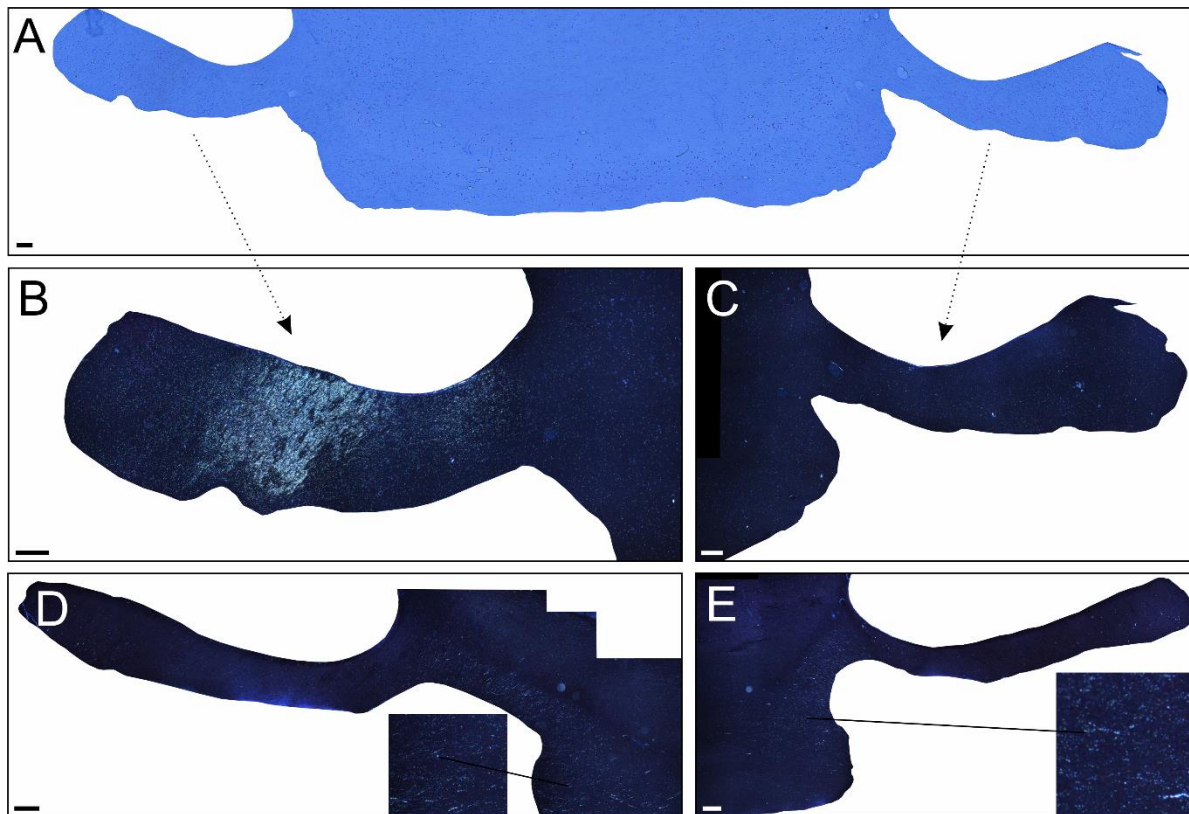

415

416 **Figure 4.** Bright- and dark-field photomicrographs of coronal sections taken at the level of the posterior fornix  
417 and dorsal hippocampal commissure (DHC), inferior to the corpus callosum. A) is a bright field photomicrograph  
418 from a case which received an anterograde tracer injection in the hippocampal formation centred in the  
419 subiculum. B) and C) show dark field photomicrographs of the same section showing strong labelling in the  
420 ipsilateral (B), but not contralateral (C), fornix; there was no obvious aggregation of label in the DHC. D) and E)  
421 show dark field photomicrographs of a separate section from another case whose injection incorporated caudal  
422 perirhinal and anterior parahippocampal cortex; these contain almost no label in the fornix but label in both the  
423 left and right DHC. Magnified inserts are included in panels D-E to aid visibility of subtle DHC labelling in the  
424 medial portion of the images. Scale bars = 200µm.

425

426

427 **In vivo human MR and cognitive data**

428 *Association between DHC microstructure and episodic memory performance*

429 We derived diffusion tensor imaging metrics (Fractional Anisotropy, FA, and Mean Diffusivity, MD  
430 (Basser and Pierpaoli 2011) from the DHC in a sub-sample of 100 participants in the Human  
431 Connectome Project (HCP) for whom T1- and diffusion-weighted MRI data was available for analysis,  
432 along with performance in three standardised memory tasks (the Picture Sequence Memory Test,  
433 PSMT (Dikmen et al. 2014); List Sorting Working Memory Test, LSWMT (Tulsky et al. 2014); and  
434 Computerized Penn Word Memory task, CPWM (Moore et al. 2015)). This enabled us to investigate  
435 whether inter-individual variation in DHC microstructure was correlated with memory performance.  
436 For comparison, these analyses were repeated in another commissure tract – the AC (see Methods).  
437 Figure 5 illustrates the DHC reconstructions in four representative HCP subjects. Streamlines broadly  
438 consistent with the known anatomy of the DHC were successfully reconstructed in 96 subjects (96%).  
439 Similarly, streamlines consistent with AC anatomy were successfully reconstructed in 99 subjects  
440 (99%). Measures of DHC and AC microstructure (FA and MD) are reported in Table 1.

441

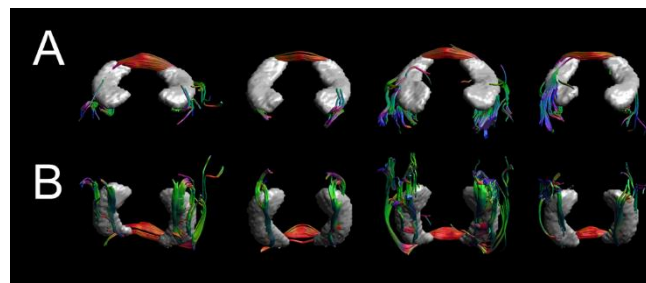

442

443 **Figure 5.** The dorsal hippocampal commissure reconstructions in four representative Human Connectome  
444 Project datasets. The reconstructions are shown in the coronal (A) and axial (B) plane.

445

446 **Table 1.** Mean measures of DHC and AC microstructure in the HCP dataset (FA and MD) and N  
447 streamlines reconstructed. Standard deviations are provided in brackets.

448

| Tract | Mean FA       | Mean MD ( $\times 10^{-3} \text{mm}^2 \text{s}^{-1}$ ) | Mean N Streamlines |
|-------|---------------|--------------------------------------------------------|--------------------|
| DHC   | 0.318 (0.059) | 1.478 (0.163)                                          | 1622.47 (1981.16)  |
| AC    | 0.439 (0.05)  | 0.854 (0.051)                                          | 4102.68 (1896.59)  |

449

450

451 **Table 2.** Mean performance in the CPWM, PSMT and LSWMT. Raw scores are reported for the CPWM,  
 452 and scaled scores are reported for the PSMT and LSWMT. Standard deviations are provided in  
 453 brackets.

| CPWM         | PSMT           | LSWMT          |
|--------------|----------------|----------------|
| 35.79 (2.78) | 112.15 (14.34) | 110.15 (11.49) |

454

455

456 Cognitive performance in the CPWM, PSMT and LSWMT is reported in Table 2. A series of two-tailed  
 457 Pearson correlation analyses revealed a significant negative association between MD and CPWM  
 458 performance in the DHC ( $r = -0.269$ ,  $p = 0.048$ , 95% CI = [-0.499, -0.017]), which was not evident in the  
 459 AC ( $r = 0.100$ ,  $p = 1.0$ , 95% CI = [-0.123, 0.297]); further, these correlations were significantly different  
 460 from one another ( $Z = -2.608$ ,  $p = 0.009$ ,  $q = 0.376$ ; see Fig 6). The correlations between DHC MD and  
 461 both PSMT and LSWMT performance were not statistically significant ( $r = -0.072$ ,  $p = 1.0$ , 95% CI = [-  
 462 0.260, 0.096];  $r = -0.047$ ,  $p = 0.649$ , 95% CI = [-0.260, 0.159], respectively); although they were not  
 463 significantly different from the association between DHC MD and CPWM performance ( $Z = -1.517$ ,  $p =$   
 464  $0.065$ ,  $q = 0.204$ ;  $Z = -1.6$ ,  $p = 0.055$ ,  $q = 0.229$ , respectively). Across the DHC and AC, there were no  
 465 other statistically significant structure-cognition associations (largest  $r = 0.211$ ,  $p = 0.240$ , 95% CI =  
 466 [0.0, 0.403]). These findings imply a potential role for the DHC in CPWM performance – a standardised  
 467 episodic memory test.

468

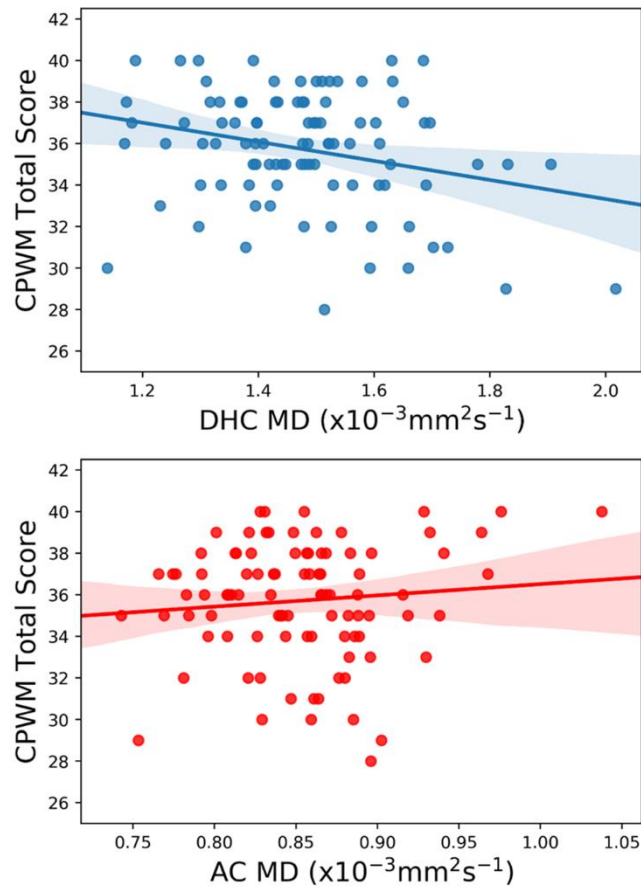

469

470 **Figure 6.** Structure-cognition correlations reported in the text. The correlations between white matter mean  
471 diffusivity (MD) and computerized Penn word memory (CPWM) total scores in the dorsal hippocampal  
472 commissure (DHC; top) and anterior commissure (AC; bottom). The best fitting linear regression line is plotted  
473 alongside 95% confidence intervals.

474

475

476 *Association between temporal regional volumes and memory*

477 Using pre-existing regional volume estimates for our HCP sub-sample, we assessed whether the  
478 bilateral volumes of MTL gray matter regions including the hippocampus, amygdala, temporal pole,  
479 entorhinal and parahippocampal cortex, are also related to memory performance. These measures  
480 were first adjusted for differences in total Intra-Cranial Volume (ICV; see Methods), and are reported  
481 in Table 3. There was no significant association between performance in any of the cognitive tasks

482 (CPWM, PSMT, or LSWMT) and the bilateral ICV-adjusted volumes of these temporal regions (largest  
483  $r = -0.189, p = 0.885, 95\% \text{ CI} = [-0.368, -0.004]$ ).

484

485 **Table 3.** Mean ICV and ICV-adjusted volumes of bilateral temporal regions. Standard deviations are  
486 provided in brackets.

| <b>Structure</b>       | <b>Volume (mm<sup>3</sup>)</b> |
|------------------------|--------------------------------|
| Total ICV              | 1587548.46 (176651.55)         |
| Hippocampus            | 8856.07 (663.78)               |
| Amygdala               | 3210.26 (310.89)               |
| Entorhinal Cortex      | 3460.21 (575.65)               |
| Parahippocampal Cortex | 4391.78 (523.85)               |
| Temporal Pole          | 4682.52 (490.93)               |

487

488

489

## 490 **Discussion**

491 This study demonstrated that white matter tractography can be used to reconstruct the DHC in both  
492 nonhuman primates (ex vivo) and humans (in vivo), and that these reconstructions broadly conform  
493 to the known anatomy of this understudied commissural fiber bundle. That these connections are  
494 distinct from those comprising the adjoining fornix is supported by the differential pattern of labelling  
495 observed in two ex vivo non-human primate specimens injected with anterograde radioactive tracer  
496 in either the subiculum of the hippocampal formation (dense labelling in the ipsilateral fornix) or  
497 perirhinal/parahippocampal cortex (labelling in the DHC). Inter-individual variation in the MD of the  
498 DHC reconstructions was also correlated with performance in a standardised episodic memory task –  
499 the CPWM. Importantly, this structure-cognition association was not evident in another commissural

500 fiber bundle – the AC – implying a degree of specificity in the association between DHC microstructure  
501 and CPWM performance. The bilateral volumes of several temporal gray matter regions were not  
502 correlated with memory performance.

503 That our tractography approach affords reconstructions of the DHC across species is consistent with a  
504 preservation of DHC morphology across humans and nonhuman primates (Gloor et al. 1993). Wei et  
505 al., recently showed that a combination of manually and anatomically-defined ROIs, including the  
506 hippocampus, could be used to reconstruct the human DHC in vivo (Wei et al. 2017). Our findings  
507 augment those of Wei et al., by demonstrating that this approach is reliable for large datasets, and by  
508 clearly defining a specific combination of ROIs that yield DHC reconstructions that broadly reflect the  
509 known anatomy. The transverse portion of the DHC reconstructions, in particular, is well differentiated  
510 from other local fiber populations such as the fornix, and was therefore the focus of our subsequent  
511 quantitative analyses.

512 The DHC is frequently described as a component of the fornix that supports inter-hemispheric  
513 connections between the hippocampi (Raslau et al. 2015; Tubbs et al. 2015). Whilst consistent with  
514 the DHC reconstructions shown here, this anatomical interpretation is potentially misleading. Our  
515 anterograde tract tracer data, for instance, highlights the distinct hippocampal and parahippocampal  
516 origins of the fibers comprising the fornix and DHC in nonhuman primates. The present specimens  
517 were previously reported alongside others with more varied injections within the hippocampal  
518 formation; again, only in cases where injections extended to parahippocampal regions was any  
519 incidental DHC labelling noted (Saunders and Aggleton 2007). The cortical origins of human DHC fibers  
520 have not been directly confirmed but the human DHC may also connect parahippocampal regions  
521 rather than the hippocampi. Hippocampal ROIs can nevertheless be used to seed DHC tractography,  
522 as evidenced by our tract reconstructions, because the hippocampus is covered by the alveus and  
523 fimbria-fornix, which do themselves briefly merge with the DHC at the tail of the hippocampus (Gloor  
524 et al. 1993). The successful propagation of DHC streamlines from hippocampal ROIs may therefore



525 reflect limitations in resolving crossing fiber populations that are associated with current tractography  
526 techniques (Jones et al. 2013). The same limitations result in a proportion of those streamlines also  
527 terminating in the contralateral hippocampal ROIs, but several streamlines did nevertheless terminate  
528 in contralateral parahippocampal regions. Although the DHC and fornix are partially contiguous, their  
529 distinct cortical origins suggests that the former may play a unique – if complementary – role in  
530 mnemonic processing.

531 The association between DHC MD and CPWM performance highlights a role for the DHC in episodic  
532 memory. We were, however, limited to analysing cognitive data from the HCP cognitive task battery,  
533 which is not necessarily optimised to investigate the role of the DHC in different memory processes.  
534 Further interpretation of the relationship between DHC MD and CPWM performance is therefore not  
535 straightforward. The CPWM is an episodic memory task in which participants must discriminate  
536 between novel and pre-exposed words, but participants are not required to perform free-recall of  
537 studied items. According to dual-process models of recognition memory (Aggleton and Brown 1999;  
538 Diana et al. 2007; Brown et al. 2010), performance in such tasks could be supported by a *familiarity-*  
539 *based* recognition memory process, which is dependent on parahippocampal regions within the MTL  
540 (particularly perirhinal cortex), rather than the hippocampus, which is instead critical for successful  
541 performance in tasks that require conscious *recollection* (e.g., free recall). Our findings therefore  
542 tentatively suggest that the DHC, may play a role in successful familiarity-based recognition memory.

543 CPWM performance is not, however, a process-pure measure of familiarity-based recognition  
544 memory. Although the CPWM places no explicit demands on recollection, this putatively distinct  
545 mnemonic process may also be recruited to aid CPWM performance. Furthermore, the association  
546 between DHC MD and CPWM performance was not significantly different to that between DHC MD  
547 and PSMT performance, and successful performance in the latter task may be more dependent upon  
548 recollection processes. To disentangle the specific memory processes that are partly dependent on  
549 DHC connections, future studies should employ a variety of episodic memory paradigms that place

550 differential demands on familiarity and recollection-based recognition memory, including both free-  
551 recall and forced-choice recognition tasks.

552 Whilst the CPWM employs verbal stimuli, the PSMT employs visual stimuli, albeit with additional  
553 verbal descriptors. The present association between DHC MD and CPWM performance was not  
554 significantly different to that between DHC MD and PSMT performance. Our study did not, therefore,  
555 reveal a differential role for the DHC in verbal compared to visual memory. Future research should  
556 employ matched verbal and visual memory paradigms to ascertain the extent to which inter-  
557 hemispheric mnemonic processing of such stimuli depends upon DHC connections. A considerable  
558 body of literature indicates a degree of hemispheric specialisation in visual and verbal processing  
559 (Gross 1972; Papanicolaou et al. 2002; Nagel et al. 2013). Whilst we identified an association between  
560 DHC microstructure and performance in one verbal episodic memory task, it is possible that DHC  
561 connections are particularly important for the mnemonic processing of task-relevant conjunctions of  
562 visual and verbal information.

563 There were no significant correlations between measures of either DHC or AC microstructure and  
564 performance in the LSWMT, implying that these tracts are not involved in working memory. However,  
565 the correlations between DHC MD and a) CPWM performance and b) LSWMT performance, were not  
566 statistically different. Future research should include tasks outside the episodic memory domain –  
567 ensuring good variability in outcome measures – to assess any contribution of the DHC to other forms  
568 of learning and memory. Our analyses also revealed no associations between memory measures and  
569 the bilateral volumes of temporal regions that are known to be connected via the DHC/AC, or play a  
570 role in successful recognition memory (Zola-Morgan et al. 1989; Squire and Zola-Morgan 1991;  
571 Aggleton and Brown 1999; Aggleton 2012; Ranganath and Ritchey 2012). Further investigations are  
572 required to understand the complex relationship between episodic memory performance, white  
573 matter microstructure and gray matter macrostructure in this region.

574 Our results imply that the human DHC is not vestigial, which has implications for the treatment of  
575 several neurological conditions. The DHC could, for instance, be incorporated into models of the  
576 cognitive impact of resective medial temporal lobe epilepsy surgeries (Trenerry et al. 1993; Dupont  
577 2015). Intracranial EEG studies indicate that a subset of seizures with a medial temporal onset have a  
578 pattern of contralateral spread to the hippocampus prior to involvement of contralateral neocortex,  
579 potentially via the DHC (Gloor et al. 1993; Rosenzweig et al. 2011). Indeed, whether due to bilateral  
580 hippocampal pathology or seizure spread, voxel-based morphometry analyses have identified a  
581 cluster of voxels that incorporates the DHC, in which white matter volume is reduced in temporal lobe  
582 epilepsy cases with bilateral hippocampal sclerosis compared to healthy controls (Miró et al. 2015).  
583 Our tractography protocols offer a complimentary approach to investigating whether DHC  
584 microstructure is also compromised in epilepsy cases with mesial temporal sclerosis.

585 An advantage of our hypothesis-driven tractography approach, is that by constraining our analyses to  
586 two commissural tracts, we reduce the risk of reporting both false-positive effects in regions for which  
587 we have no specific predictions, and false-negative effects when true structure–cognition  
588 relationships are obscured following corrections for large numbers of statistical comparisons. Another  
589 advantage of our tractography approach, in which we extract DT-MRI-based microstructural indices  
590 that are averaged over a given tract-of-interest, is that it may be more sensitive to subtle  
591 microstructural differences that are distributed along the length of the tracts compared with voxel-  
592 based methods in which such differences must be clustered in order to detect a significant effect in  
593 group-level analyses (e.g., Tract-Based Spatial Statistics) (Smith et al. 2006). Voxel-based methods and  
594 metrics that take into account dispersed structural differences could, however, provide  
595 complimentary evidence of a role for the DHC in memory. Anatomical Connectivity Mapping (ACM),  
596 has recently been proposed as a method of quantifying the strength of connectivity of individual  
597 voxels with the rest of the brain (Bozzali et al. 2011). Within a tract, the ACM metric at a given voxel  
598 may be sensitive to structural differences further along that tract. Similar to our approach, an average  
599 or median ACM measure can also be derived for a given tract-of-interest, and used in subsequent

600 structure-behaviour or structure-cognition correlations (Lyksborg et al. 2014). ACM could potentially  
601 provide complimentary evidence of a role for the DHC in episodic memory.

602 Although DHC MD correlated with CPWM performance, DHC FA was not associated with performance.  
603 FA and MD are both affected by multiple axonal properties, including myelination, density, diameter,  
604 and configuration as well as partial volume interactions with tract size (Vos et al. 2011; Jones et al.  
605 2013). It is therefore not possible to attribute differences between our FA/MD findings to a single  
606 white-matter subcomponent.

607 In summary, to our knowledge this is the first study to use cross-species anatomical evidence to  
608 highlight the DHC as a discrete tract in primates and to systematically reconstruct it using advanced  
609 tractography techniques. Reconstructions of the human and nonhuman primate DHC broadly conform  
610 to the known anatomy of this tract, affording investigations of the role of the DHC in learning and  
611 memory. Indeed, we are also the first to demonstrate a correlation between inter-individual variation  
612 in the microstructure of *in vivo* DHC tract reconstructions and differences in a measure of episodic  
613 memory performance. Our understanding of the unique role of the DHC in human learning and  
614 memory, in both health and disease, is sparse, but the approach described here should advance our  
615 knowledge of those aspects of human memory that are partly dependent upon inter-hemispheric  
616 processing via the DHC.

617

618

### 619 **Acknowledgements**

620 DKJ and GDP are supported by a Wellcome Trust Investigator Award (096646/Z/11/Z) and a Wellcome  
621 Trust Strategic Award (104943/Z/14/Z). MP\* is currently supported by the Medical Research Council  
622 (MR/N01233X/1). Data used in the preparation of this work were obtained from the MGH-USC Human  
623 Connectome Project (HCP) database (<https://ida.loni.usc.edu/login.jsp>). The HCP project (Principal

624 Investigators: Bruce Rosen, M.D., Ph.D., Martinos Center at Massachusetts General Hospital; Arthur  
625 W. Toga, Ph.D., University of California, Los Angeles, Van J. Weeden, MD, Martinos Center at  
626 Massachusetts General Hospital) is supported by the National Institute of Dental and Craniofacial  
627 Research (NIDCR), the National Institute of Mental Health (NIMH) and the National Institute of  
628 Neurological Disorders and Stroke (NINDS). Collectively, the HCP is the result of efforts of co-  
629 investigators from the University of California, Los Angeles, Martinos Center for Biomedical Imaging  
630 at Massachusetts General Hospital (MGH), Washington University, and the University of Minnesota.

631

632

### 633 **Author Contributions**

634 MW developed the initial concept for this study, and the subsequent study design was developed by  
635 MP\*, DKJ, and MW. Ex vivo vervet monkey MR images were previously acquired by HL, MP, and TBD,  
636 who contributed these existing datasets for the present tractography analyses. JA obtained and  
637 contributed both bright and dark field images from existing ex vivo cynomolgus monkey specimens.  
638 MP\*, and MW performed tractography analyses with input from GDP, and under the supervision of  
639 DKJ. All statistical analyses were performed by MP\* and MW with input from DKJ. All authors  
640 provided critical revision of the manuscript, thereby providing important intellectual content.

641

### 642 **Competing Interests Statement**

643 The authors declare no competing interests.

644

### 645 **References**

646 Aggleton JP. 2008. EPS Mid-Career Award 2006. Understanding anterograde amnesia:

- 647           disconnections and hidden lesions. *Q J Exp Psychol (Hove)*. 61:1441–1471.
- 648   Aggleton JP. 2012. Multiple anatomical systems embedded within the primate medial temporal lobe:  
649           Implications for hippocampal function. *Neurosci Biobehav Rev*. 36:1579–1596.
- 650   Aggleton JP, Brown MW. 1999. Episodic memory, amnesia, and the hippocampal-anterior thalamic  
651           axis. *Behav Brain Sci*. 22:425-444; discussion 444-489.
- 652   Basser PJ, Pierpaoli C. 2011. Microstructural and physiological features of tissues elucidated by  
653           quantitative-diffusion-tensor MRI. *J Magn Reson*. 213:560–570.
- 654   Begré S, Kiefer C, Von Känel R, Frommer A, Federspiel A. 2009. Rey Visual Design Learning Test  
655           performance correlates with white matter structure. *Acta Neuropsychiatr*. 21:67–74.
- 656   Botez-Marquard, T; Botez M. 1987. Memory Deficits After Damage to the Anterior Commissure and  
657           Right Fornix. *Arch Neurol*. 49:321–324.
- 658   Bozzali M, Parker GJM, Serra L, Embleton K, Gili T, Perri R, Caltagirone C, Cercignani M. 2011.  
659           Anatomical connectivity mapping: A new tool to assess brain disconnection in Alzheimer’s  
660           disease. *Neuroimage*. 54:2045–2051.
- 661   Brown MW, Warburton EC, Aggleton JP. 2010. Recognition memory: Material, processes, and  
662           substrates. *Hippocampus*. 20:1228–1244.
- 663   Clark CR, Geffen GM. 1989. Corpus callosum surgery and recent memory: A review. *Brain*. 112:165–  
664           175.
- 665   Cohen J. 1988. *Statistical Power Analysis for the Behavioral Sciences*, Routledge Academic. Lawrence  
666           Erlbaum Associates, Publishers.
- 667   Cook PA, Bai Y, Nedjati-Gilani S, Seunarine KK, Hall MG, Parker GJ, Alexander DC. 2006. Camino:  
668           Open-source diffusion-MRI reconstruction and processing. Proc 14th Sci Meet Int Soc Magn  
669           Reson Med Seattle, Washington, USA. 14.

- 670 D'Esposito M, Verfaellie M, Alexander MP, Katz DI. 1995. Amnesia following traumatic bilateral  
671 fornix transection. *Neurology*. 45:1546–1550.
- 672 Demeter S, Rosene DL, van Hoesen GW. 1985. Interhemispheric pathways of the hippocampal  
673 formation, presubiculum, and entorhinal and posterior parahippocampal cortices in the rhesus  
674 monkey: The structure and organization of the hippocampal commissures. *J Comp Neurol*.  
675 233:30–47.
- 676 Demeter S, Rosene DL, Van Hoesen GW. 1990. Fields of origin and pathways of the interhemispheric  
677 commissures in the temporal lobe of macaques. *J Comp Neurol*. 302:29–53.
- 678 Diana RA, Yonelinas AP, Ranganath C. 2007. Imaging recollection and familiarity in the medial  
679 temporal lobe: a three-component model. *Trends Cogn Sci*. 11:379–386.
- 680 Dikmen SS, Bauer PJ, Weintraub S, Mungas D, Slotkin J, Beaumont JL, Gershon R, Temkin NR, Heaton  
681 RK. 2014. Measuring episodic memory across the lifespan: NIH toolbox picture sequence  
682 memory test. *J Int Neuropsychol Soc*. 20:611–619.
- 683 Doty RW, Ringo JL, Lewine JD. 1988. Forebrain commissures and visual memory: a new approach.  
684 *Behav Brain Res*. 29:267–280.
- 685 Dupont S. 2015. Imaging memory and predicting postoperative memory decline in temporal lobe  
686 epilepsy: Insights from functional imaging. *Rev Neurol (Paris)*. 4620:201 YP-325.
- 687 Dyrby TB, Baaré WFC, Alexander DC, Jelsing J, Garde E, Søggaard L V. 2011. An ex vivo imaging  
688 pipeline for producing high-quality and high-resolution diffusion-weighted imaging datasets.  
689 *Hum Brain Mapp*. 32:544–563.
- 690 Dyrby TB, Innocenti GM, Bech M, Lundell H. 2018. Validation strategies for the interpretation of  
691 microstructure imaging using diffusion MRI. *Neuroimage*.
- 692 Dyrby TB, Lundell H, Burke MW, Reisleiv NL, Paulson OB, Ptito M, Siebner HR. 2014. Interpolation of

- 693 diffusion weighted imaging datasets. *Neuroimage*. 103:202–213.
- 694 Dyrby TB, SØgaard L V, Hall MG, Ptito M, Alexander DC. 2013. Contrast and stability of the axon  
695 diameter index from microstructure imaging with diffusion MRI. *Magn Reson Med*. 70:711–  
696 721.
- 697 Fedorov, A., Li, X., Pohl, K.M., Bouix, S., Styner, M., Addicott, M., Wyatt, C., Daunais, J.B., Wells,  
698 W.M., & Kikinis R. 2011. Atlas-Guided Segmentation of Vervet Monkey Brain MRI. *Open*  
699 *Neuroimag J*. 5:186–197.
- 700 Glasser MF, Sotiropoulos SN, Wilson JA, Coalson TS, Fischl B, Andersson JL, Xu J, Jbabdi S, Webster  
701 M, Polimeni JR, Van Essen DC, Jenkinson M. 2013. The minimal preprocessing pipelines for the  
702 Human Connectome Project. *Neuroimage*. 80:105–124.
- 703 Gloor P, Salanova V, Olivier A, Quesney LF. 1993. The human dorsal hippocampal commissure. *Brain*.  
704 116:1249–1273.
- 705 Gross MM. 1972. Hemispheric specialization for processing of visually presented verbal and spatial  
706 stimuli. *Percept Psychophys*. 12:357–363.
- 707 Gur RC, Richard J, Hughett P, Calkins ME, Macy L, Bilker WB, Brensinger C, Gur RE. 2010. A cognitive  
708 neuroscience-based computerized battery for efficient measurement of individual differences:  
709 Standardization and initial construct validation. *J Neurosci Methods*. 187:254–262.
- 710 Heilman KM, Sybert GW. 1977. Korsakoff's syndrome resulting from bilateral fornix lesions.  
711 *Neurology*. 27:490 LP-490.
- 712 Jenkinson M, Bannister P, Brady M, Smith S. 2002. Improved Optimization for the Robust and  
713 Accurate Linear Registration and Motion Correction of Brain Images. *Neuroimage*. 17:825–841.
- 714 Jenkinson M, Smith S. 2001. A global optimisation method for robust affine registration of brain  
715 images. *Med Image Anal*. 5:143–156.



- 716 Jeurissen B, Leemans A, Jones DK, Tournier J-D, Sijbers J. 2011. Probabilistic fiber tracking using the  
717 residual bootstrap with constrained spherical deconvolution. *Hum Brain Mapp.* 32:461–479.
- 718 Jeurissen B, Tournier J-D, Dhollander T, Connelly A, Sijbers J. 2014. Multi-tissue constrained spherical  
719 deconvolution for improved analysis of multi-shell diffusion MRI data. *Neuroimage.* 103:411–  
720 426.
- 721 Johnson H, Harris G, Williams K. 2007. BRAINSFit: Mutual Information Rigid Registrations of Whole-  
722 Brain 3D Images, Using the Insight Toolkit. *Insight J.* 1–10.
- 723 Jones DK, Knösche TR, Turner R. 2013. White matter integrity, fiber count, and other fallacies: The  
724 do's and don'ts of diffusion MRI. *Neuroimage.* 73:239–254.
- 725 Klingler J, Gloor P. 1960. The connections of the amygdala and of the anterior temporal cortex in the  
726 human brain. *J Comp Neurol.* 115:333–369.
- 727 Leemans A, Jeurissen B, Sijbers J, Jones D. 2009. ExploreDTI: a graphical toolbox for processing,  
728 analyzing, and visualizing diffusion MR data. *Proc 17th Sci Meet Int Soc Magn Reson Med.*  
729 17:3537.
- 730 Lewine JD, Doty RW, Astur RS, Provencal SL. 1994. Role of the forebrain commissures in  
731 bihemispheric mnemonic integration in macaques. *J Neurosci.* 14:2515–2530.
- 732 Luders E, Gaser C, Narr KL, Toga AW. 2009. Why Sex Matters: Brain Size Independent Differences in  
733 Gray Matter Distributions between Men and Women. *J Neurosci.* 29:14265–14270.
- 734 Lyksborg M, Siebner HR, Sørensen PS, Blinkenberg M, Parker GJM, Dogonowski AM, Garde E, Larsen  
735 R, Dyrby TB. 2014. Secondary progressive and relapsing remitting multiple sclerosis leads to  
736 motor-related decreased anatomical connectivity. *PLoS One.* 9.
- 737 Mahut H, Moss M, Zola-Morgan S. 1981. Retention deficits after combined amygdalo-hippocampal  
738 and selective hippocampal resections in the monkey. *Neuropsychologia.* 19:201–225.

- 739 Mark LP, Daniels DL, Naidich TP, Yetkin Z, Borne J a. 1993. Anatomic moment - the hippocampus. Am  
740 J Neuroradiol. 14:709–712.
- 741 Metzler-Baddeley C, Jones DK, Belaroussi B, Aggleton JP, O’Sullivan MJ. 2011. Frontotemporal  
742 connections in episodic memory and aging: a diffusion MRI tractography study. J Neurosci.  
743 31:13236–13245.
- 744 Miró J, Gurtubay-Antolin A, Ripollés P, Sierpowska J, Juncadella M, Fuentemilla L, Sánchez V, Falip M,  
745 Rodríguez-Fornells A. 2015. Interhemispheric microstructural connectivity in bitemporal lobe  
746 epilepsy with hippocampal sclerosis. Cortex. 67:106–121.
- 747 Moore TM, Reise SP, Gur RE, Hakonarson H, Gur RC. 2015. Psychometric properties of the Penn  
748 Computerized Neurocognitive Battery. Neuropsychology. 29:235-246.
- 749 Moss M, Mahut H, Zola-Morgan S. 1981. Concurrent discrimination learning of monkeys after  
750 hippocampal, entorhinal, or fornix lesions. J Neurosci. 1:227–240.
- 751 Mugler JP, Brookeman JR. 1990. Three-dimensional magnetization-prepared rapid gradient-echo  
752 imaging (3D MP RAGE). Magn Reson Med. 15:152–157.
- 753 Nagel BJ, Herting MM, Maxwell EC, Bruno R, Fair D. 2013. Hemispheric lateralization of verbal and  
754 spatial working memory during adolescence. Brain Cogn. 82:58–68.
- 755 Ota M, Obata T, Akine Y, Ito H, Ikehira H, Asada T, Suhara T. 2006. Age-related degeneration of  
756 corpus callosum measured with diffusion tensor imaging. Neuroimage. 31:1445–1452.
- 757 Papanicolaou AC, Simos PG, Castillo EM, Breier JI, Katz JS, Wright AA. 2002. The Hippocampus and  
758 Memory of Verbal and Pictorial Material. Learn Mem. 9:99–104.
- 759 Patenaude B, Smith SM, Kennedy DN, Jenkinson M. 2011. A Bayesian model of shape and  
760 appearance for subcortical brain segmentation. Neuroimage. 56:907–922.
- 761 Phelps EA, Hirst W, Gazzaniga MS. 1991. Deficits in recall following partial and complete

- 762 commissurotomy. *Cereb Cortex*. 1:492–491.
- 763 Pohl KM, Bouix S, Nakamura M, Rohlfing T, McCarley RW, Kikinis R, Grimson WEL, Shenton ME, Wells  
764 WM. 2007. A hierarchical algorithm for MR brain image parcellation. *IEEE Trans Med Imaging*.  
765 26:1201–1212.
- 766 Ranganath C, Ritchey M. 2012. Two cortical systems for memory-guided behaviour. *Nat Rev*  
767 *Neurosci*. 13:713.
- 768 Raslau FD, Augustinack JC, Klein AP, Ulmer JL, Mathews VP, Mark LP. 2015. Memory part 3: The role  
769 of the fornix and clinical cases. *Am J Neuroradiol*. 36:1604–1608.
- 770 Ritchie SJ, Cox SR, Shen X, Lombardo M V, Reus LM, Alloza C, Harris MA, Alderson HL, Hunter S,  
771 Neilson E, Liewald DCM, Auyeung B, Whalley HC, Lawrie SM, Gale CR, Bastin ME, McIntosh AM,  
772 Deary IJ. 2018. Sex Differences in the Adult Human Brain: Evidence from 5216 UK Biobank  
773 Participants. *Cereb Cortex*. 28:2959–2975.
- 774 Rosenzweig I, Beniczky S, Brunnhuber F, Alarcon G, Valentin A. 2011. The Dorsal Hippocampal  
775 Commissure: When Functionality Matters. *J Neuropsychiatry Clin Neurosci*. 23:E45–E48.
- 776 Saunders RC, Aggleton JP. 2007. Origin and topography of fibers contributing to the fornix in  
777 macaque monkeys. *Hippocampus*. 17:396–411.
- 778 Smith SM, Jenkinson M, Johansen-Berg H, Rueckert D, Nichols TE, Mackay CE, Watkins KE, Ciccarelli  
779 O, Cader MZ, Matthews PM, Behrens TEJ. 2006. Tract-based spatial statistics: Voxelwise  
780 analysis of multi-subject diffusion data. *Neuroimage*. 31:1487–1505.
- 781 Smith SM, Jenkinson M, Woolrich MW, Beckmann CF, Behrens TEJ, Johansen-Berg H, Bannister PR,  
782 De Luca M, Drobnjak I, Flitney DE, Niazy RK, Saunders J, Vickers J, Zhang Y, De Stefano N, Brady  
783 JM, Matthews PM. 2004. Advances in functional and structural MR image analysis and  
784 implementation as FSL. *Neuroimage*. 23:208–219.

- 785 Sotiropoulos SN, Moeller S, Jbabdi S, Xu J, Andersson JL, Auerbach EJ, Yacoub E, Feinberg D,  
786 Setsompop K, Wald LL, Behrens TEJ, Ugurbil K, Lenglet C. 2013. Effects of image reconstruction  
787 on fiber orientation mapping from multichannel diffusion MRI: Reducing the noise floor using  
788 SENSE. *Magn Reson Med.* 70:1682–1689.
- 789 Squire LR, Zola-Morgan S. 1991. The medial temporal lobe memory system. *Science.* 253:1380–1386.
- 790 Sullivan E V., Rohlfing T, Pfefferbaum A. 2010. Quantitative fiber tracking of lateral and  
791 interhemispheric white matter systems in normal aging: Relations to timed performance.  
792 *Neurobiol Aging.* 31:464–481.
- 793 Tournier J-D, Yeh C-H, Calamante F, Cho K-H, Connolly A, Lin C-P. 2008. Resolving crossing fibres  
794 using constrained spherical deconvolution: Validation using diffusion-weighted imaging  
795 phantom data. *Neuroimage.* 42:617–625.
- 796 Trenerry MR, Jack CR, Ivnik RJ, Sharbrough FW, Cascino GD, Hirschorn KA, Marsh WR, Kelly PJ, Meyer  
797 FB. 1993. MRI hippocampal volumes and memory function before and after temporal  
798 lobectomy. *Neurology.* 43:1800 LP-1800.
- 799 Tubbs RS, Bosmia AN, Gupta T, Chawla K, Loukas M, Sahni D, Cohen-Gadol AA. 2015. The Enigmatic  
800 Psalterium: A Review and Anatomic Study With Relevance to Callosotomy Procedures. *Oper*  
801 *Neurosurg.* 11:322–328.
- 802 Tulskey DS, Carlozzi N, Chiaravalloti ND, Beaumont JL, Kisala PA, Mungas D, Conway K, Gershon R.  
803 2014. NIH toolbox cognition battery (NIHTB-CB): List sorting test to measure working memory.  
804 *J Int Neuropsychol Soc.* 20:599–610.
- 805 Turner BH, Mishkin M, Knapp ME. 1979. Distribution of the anterior commissure to the amygdaloid  
806 complex in the monkey. *Brain Res.* 162:331–337.
- 807 Van Essen DC, Smith SM, Barch DM, Behrens TEJ, Yacoub E, Ugurbil K. 2013. The WU-Minn Human  
808 Connectome Project: An overview. *Neuroimage.* 80:62–79.

809 Voevodskaya O, Simmons A, Nordenskjöld R, Kullberg J, Ahlström H, Lind L, Wahlund L-O, Larsson E-  
810 M, Westman E. 2014. The effects of intracranial volume adjustment approaches on multiple  
811 regional MRI volumes in healthy aging and Alzheimer's disease . Front Aging Neurosci .  
812 Vos SB, Jones DK, Viergever MA, Leemans A. 2011. Partial volume effect as a hidden covariate in DTI  
813 analyses. Neuroimage. 55:1566–1576.  
814 Wei PH, Mao ZQ, Cong F, Yeh FC, Wang B, Ling ZP, Liang SL, Chen L, Yu XG. 2017. In vivo visualization  
815 of connections among revised Papez circuit hubs using full q-space diffusion spectrum imaging  
816 tractography. Neuroscience. 357:400–410.  
817 Weintraub S, Dikmen SS, Heaton RK, Tulsky DS, Zelazo PD, Bauer PJ, Carlozzi NE, Slotkin J, Blitz D,  
818 Wallner-Allen K, Fox NA, Beaumont JL, Mungas D, Nowinski CJ, Richler J, Deocampo JA,  
819 Anderson JE, Manly JJ, Borosh B, Havlik R, Conway K, Edwards E, Freund L, King JW, Moy C, Witt  
820 E, Gershon RC. 2013. Cognition assessment using the NIH Toolbox. Neurology. 80:S54 LP-S64.  
821 Woods RP, Fears SC, Jorgensen MJ, Fairbanks LA, Toga AW, Freimer NB. 2011. A web-based brain  
822 atlas of the vervet monkey, *Chlorocebus aethiops*. Neuroimage. 54:1872–1880.  
823 Zola-Morgan S, Squire LR, Amaral DG, Suzuki WA. 1989. Lesions of perirhinal and parahippocampal  
824 cortex that spare the amygdala and hippocampal formation produce severe memory  
825 impairment. J Neurosci. 9:4355–4370.  
826
